# Supplementary material
Source: Springer Nature journal article supplement (https://www.springermedizin.de/resource/supplementary/12885_2009_1973_MOESM2_ESM.pdf/9460218)

### PSQ general satisfaction

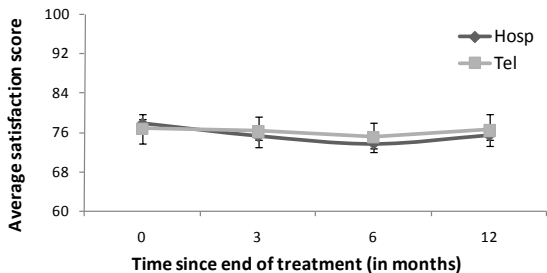

### PSQ access of care

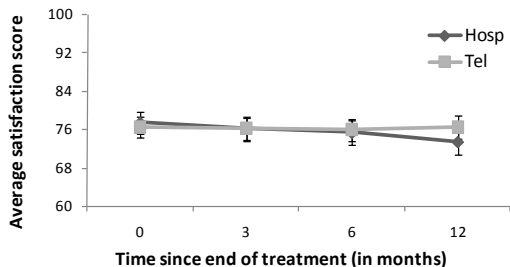

### PSQ technical competences

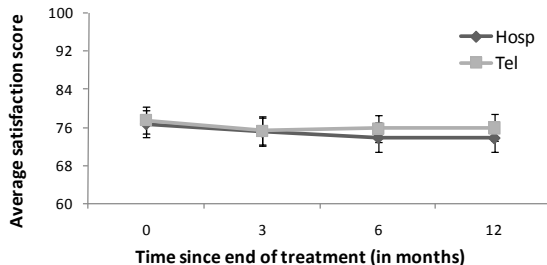

### PSQ interpersonal aspects

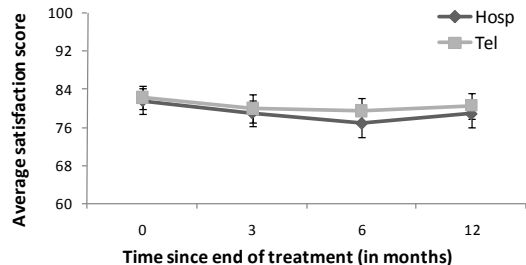

Supplement: MOESM2 [file 9460218]
